# Supplementary material for: In Vitro Characterization of a Tissue Renin-Angiotensin System in Human Nucleus Pulposus Cells
Source: MDPI journal article supplement (doi:10.3390/cells11213418), 2022-10-28
Supplement: s1 [file s1]

# ACAN

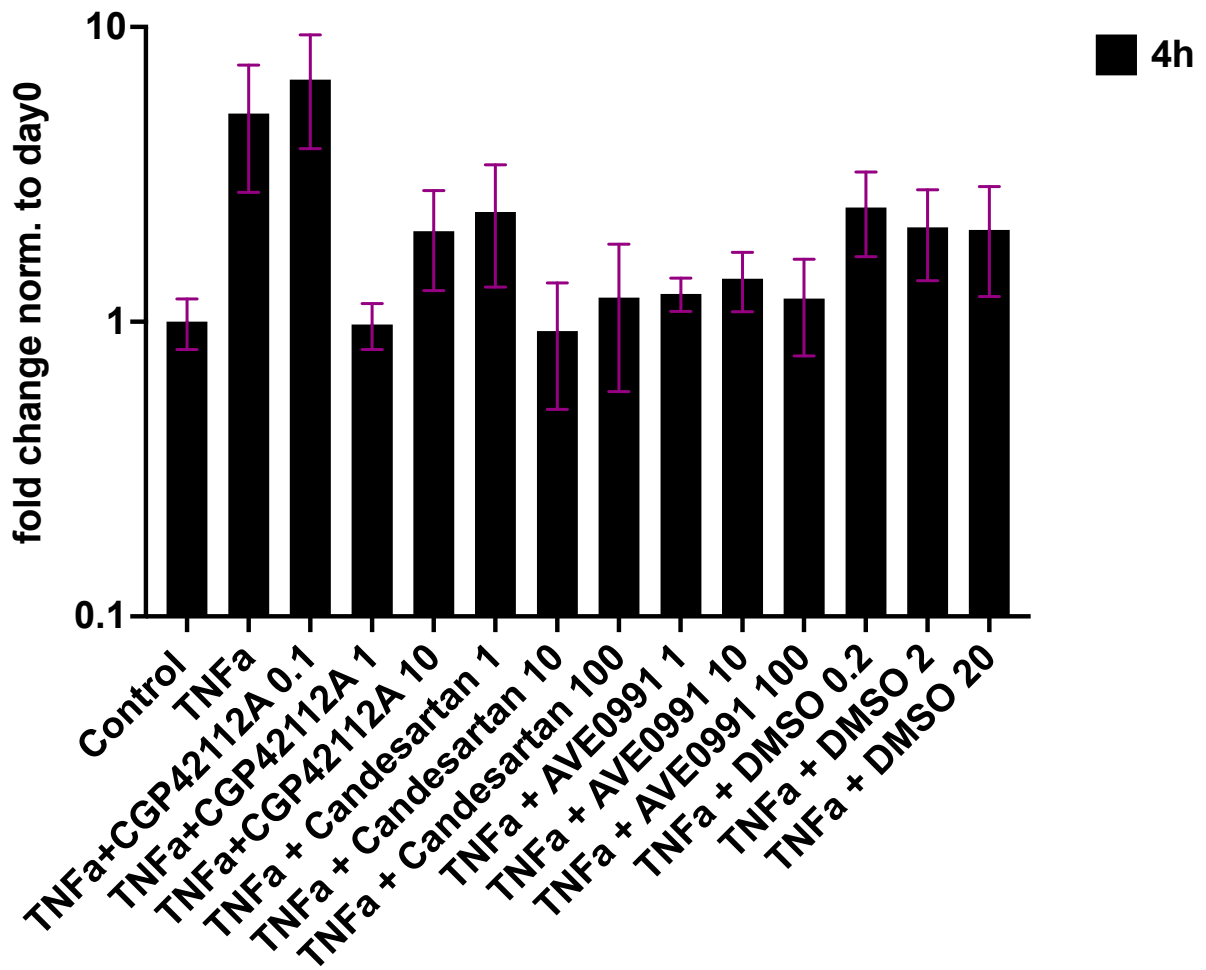

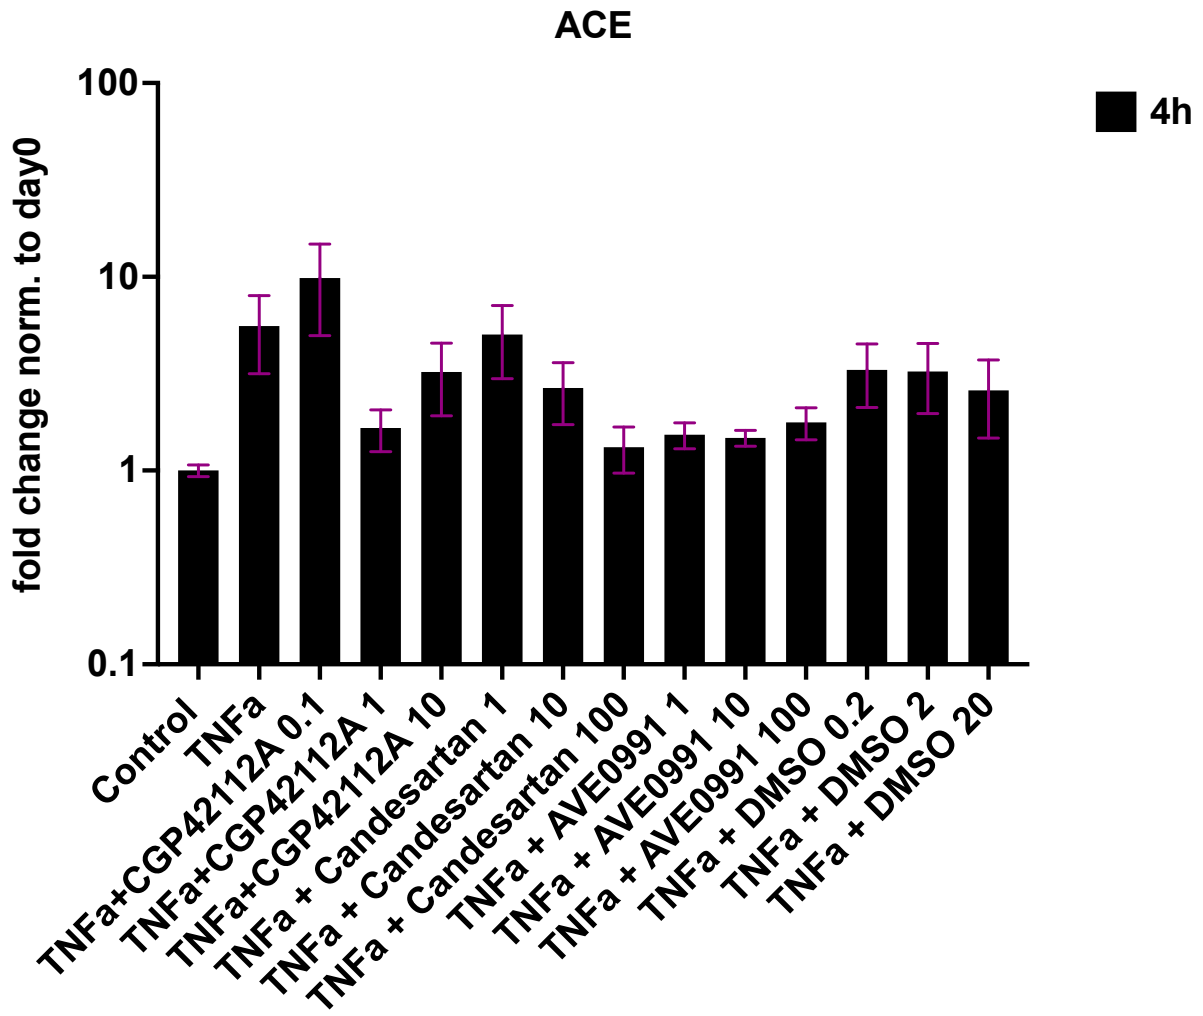

## ACE2

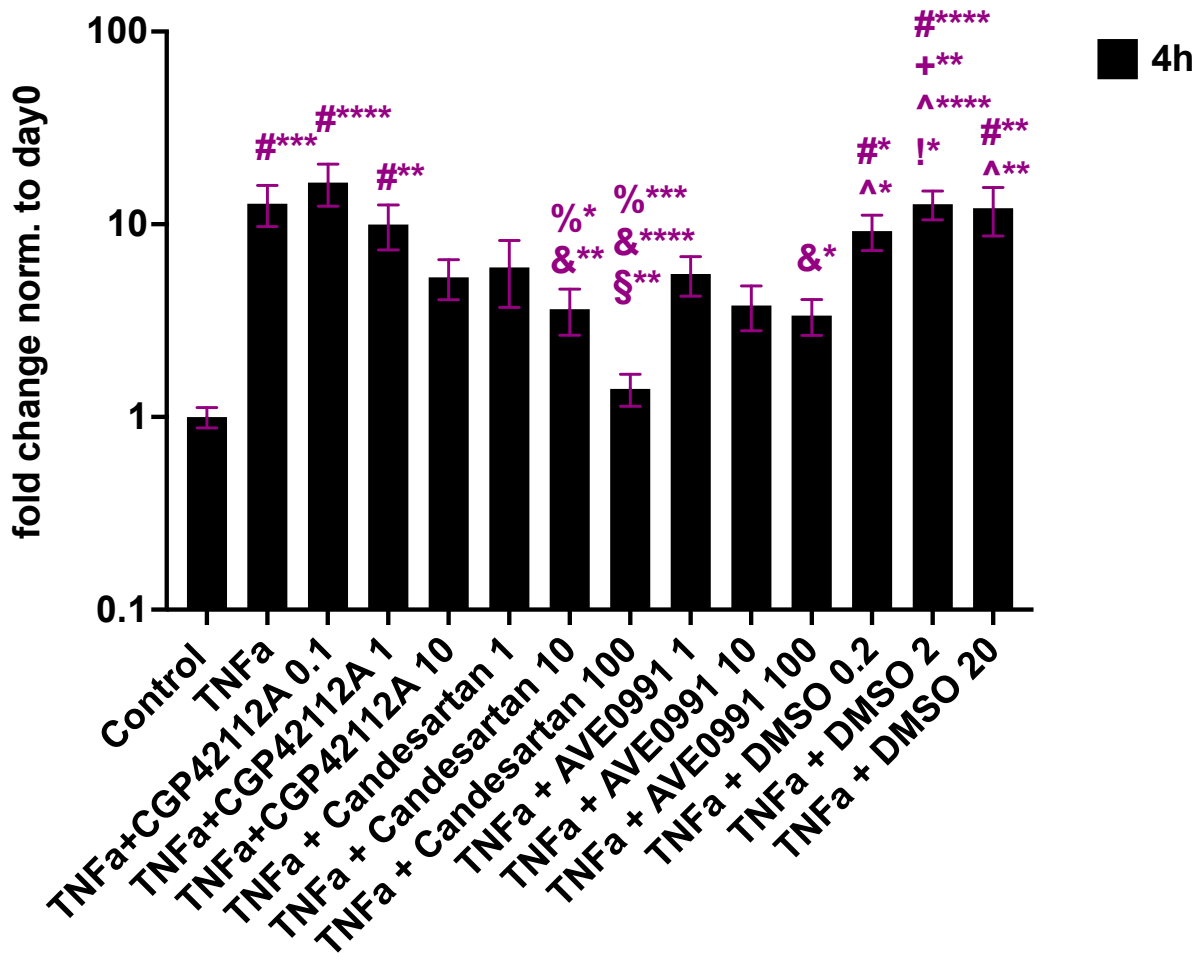

# AGT

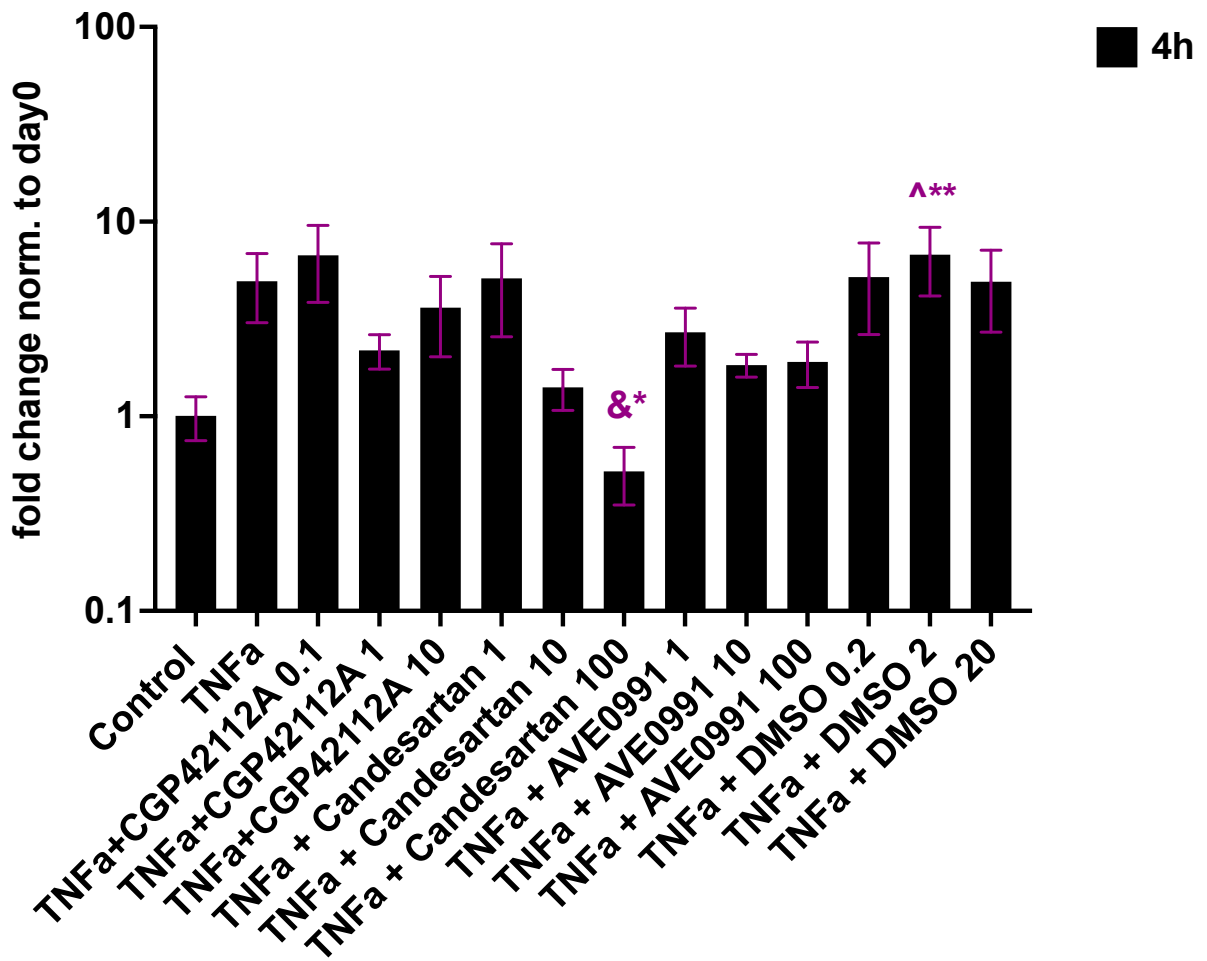

AGTR1

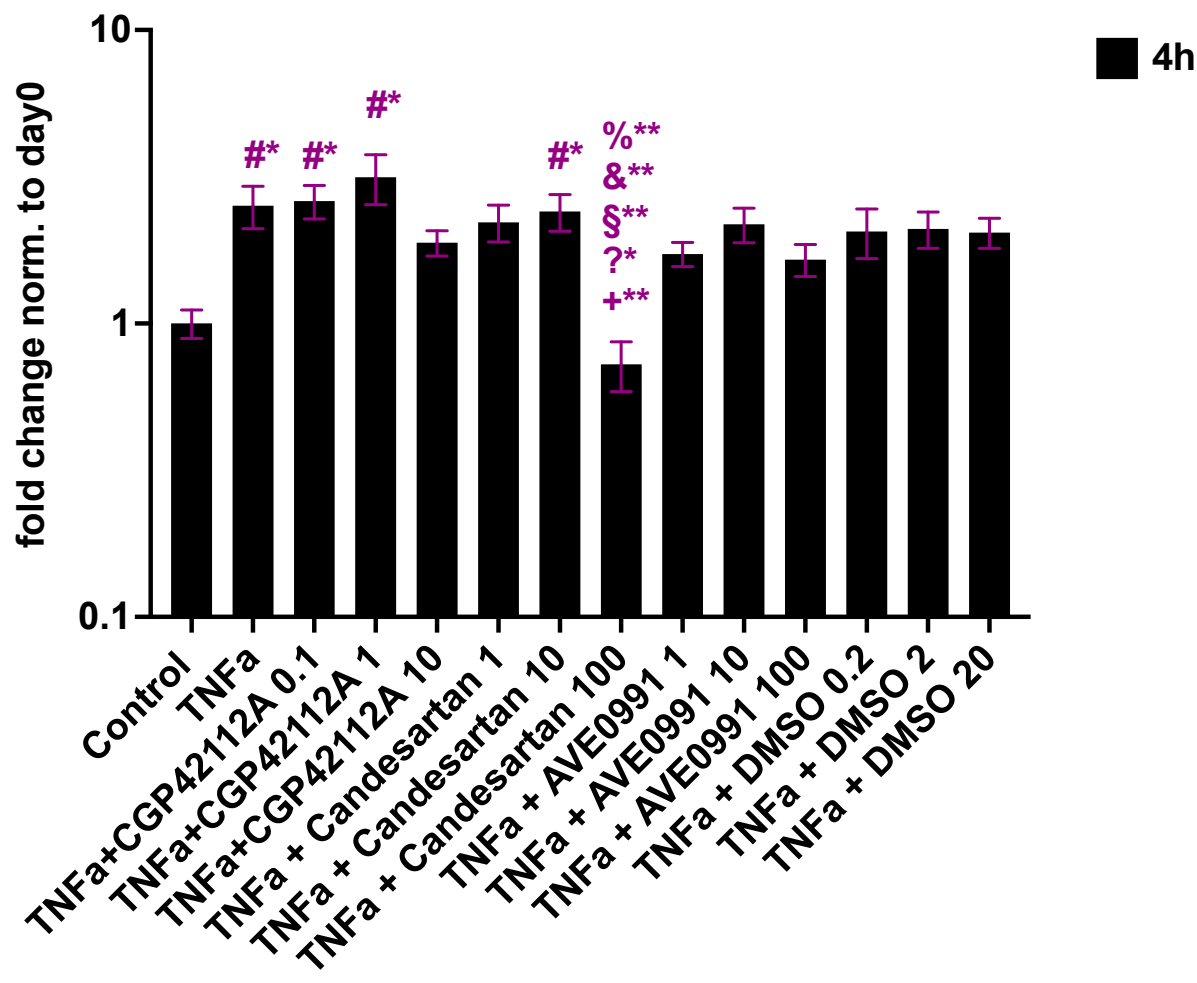

## AGTR2

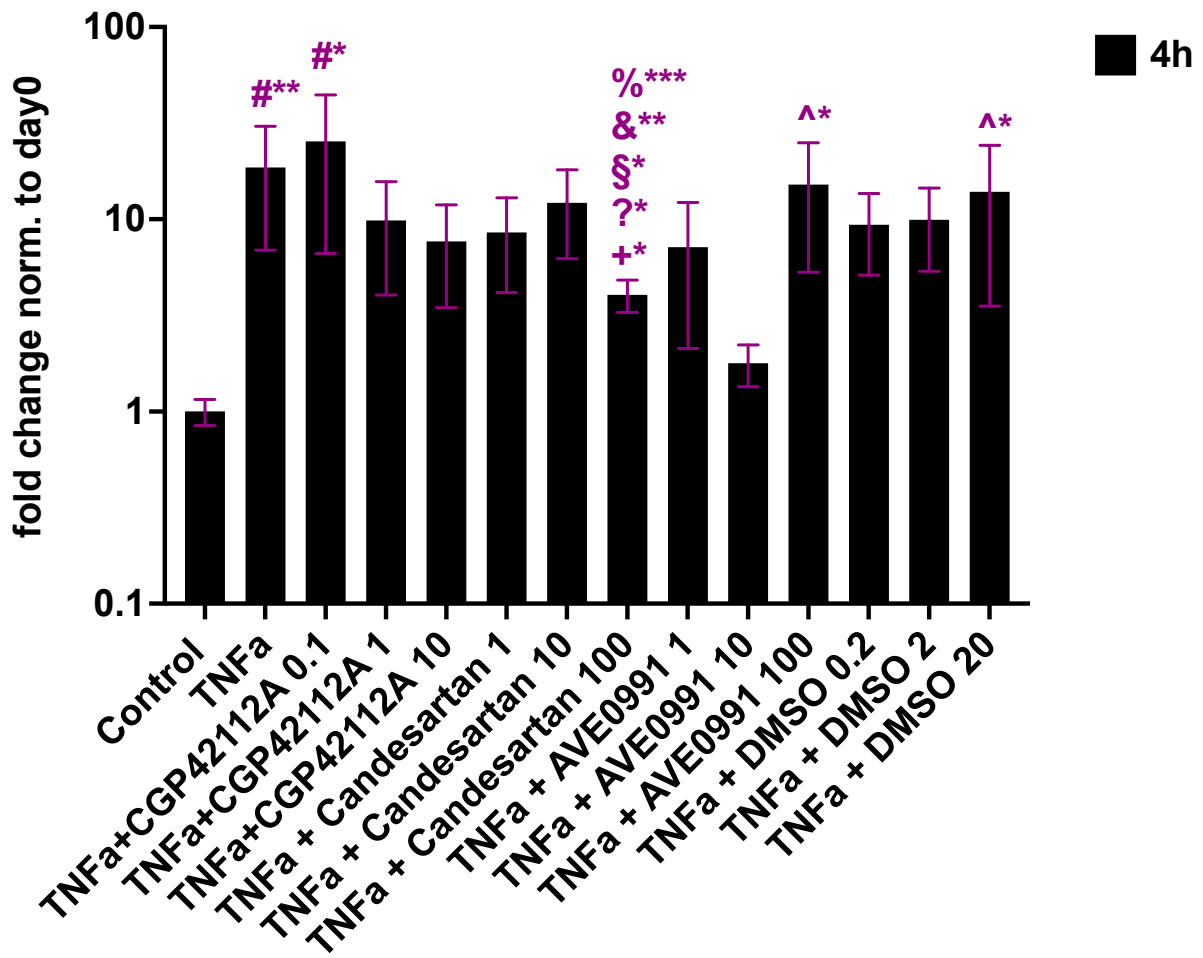

COL1

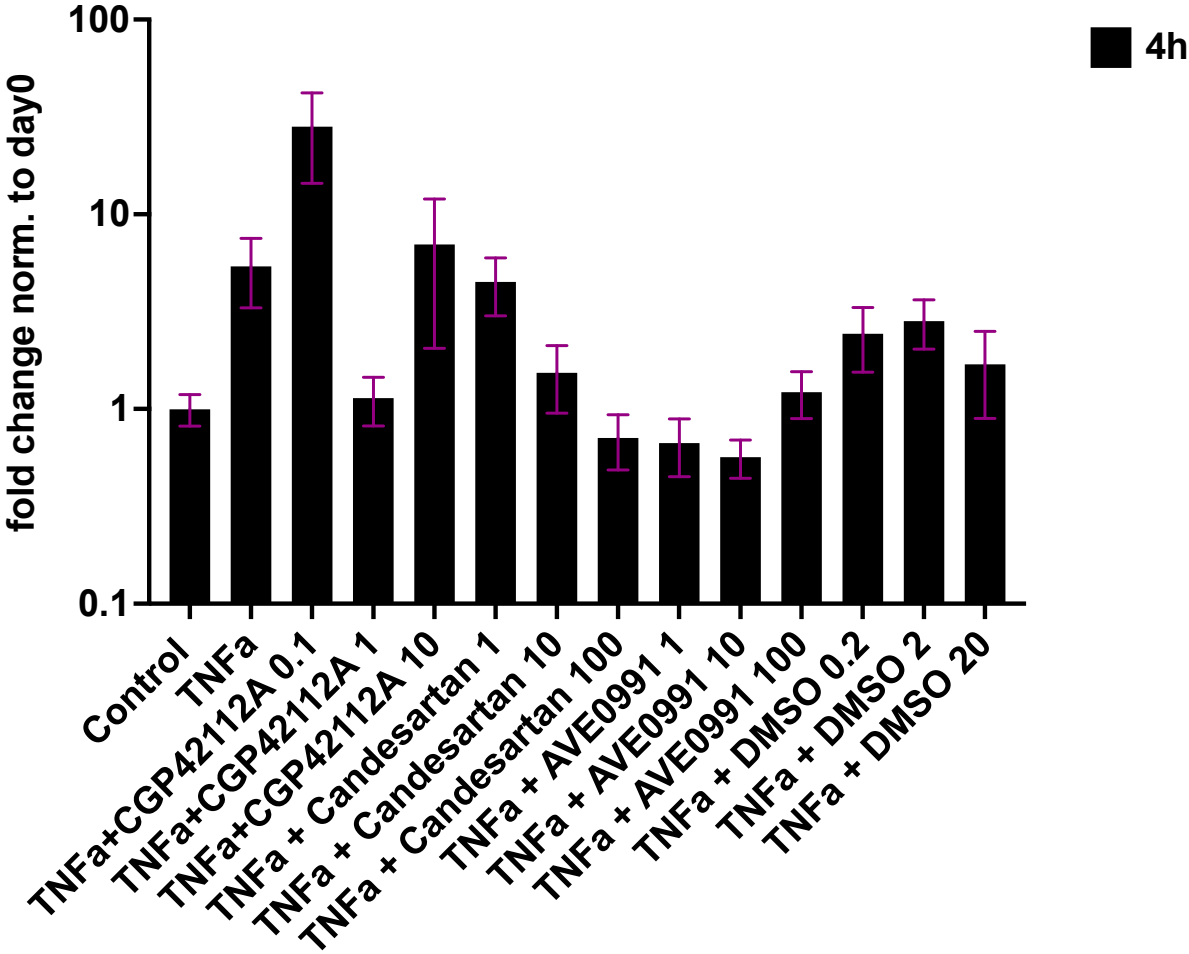

## COL2

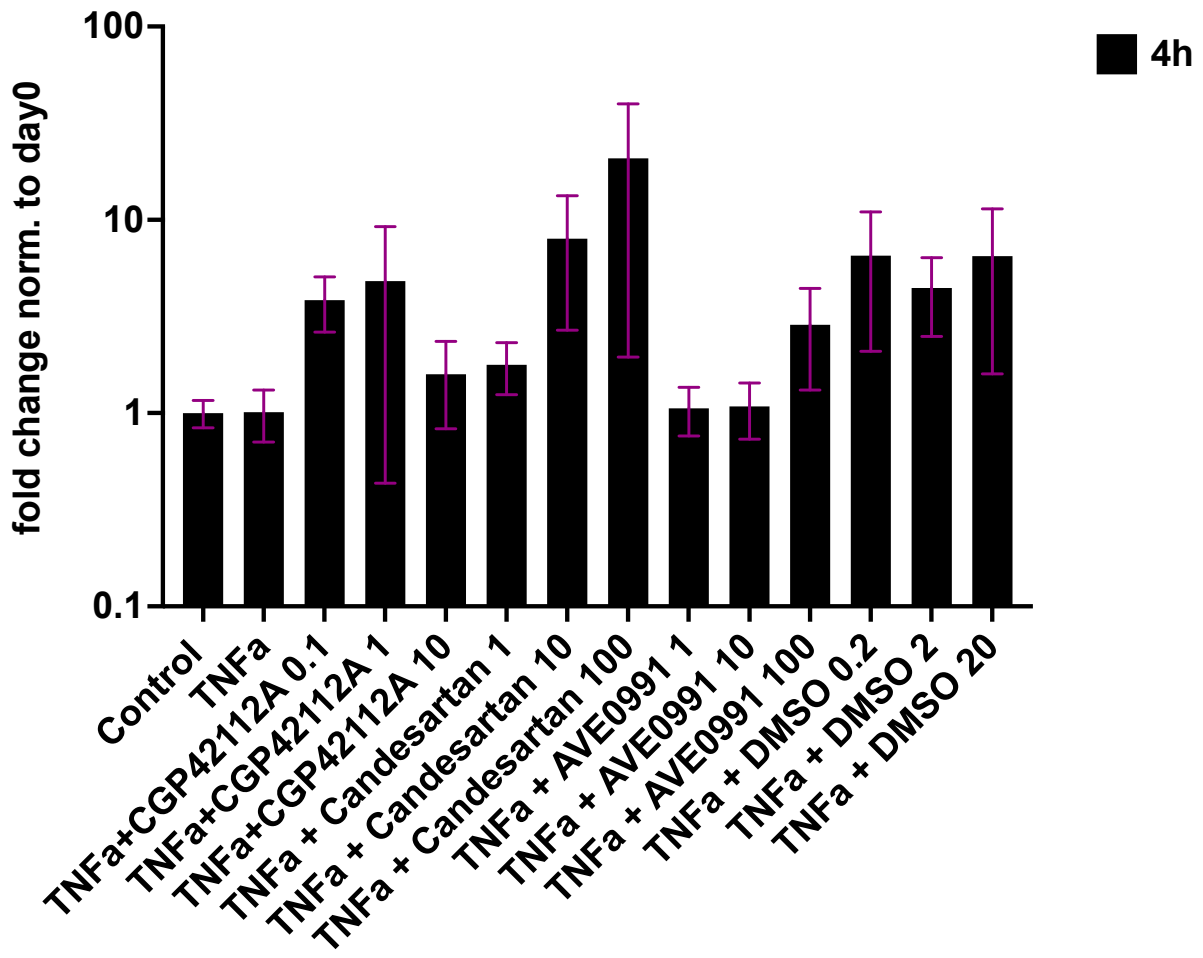



CTSD

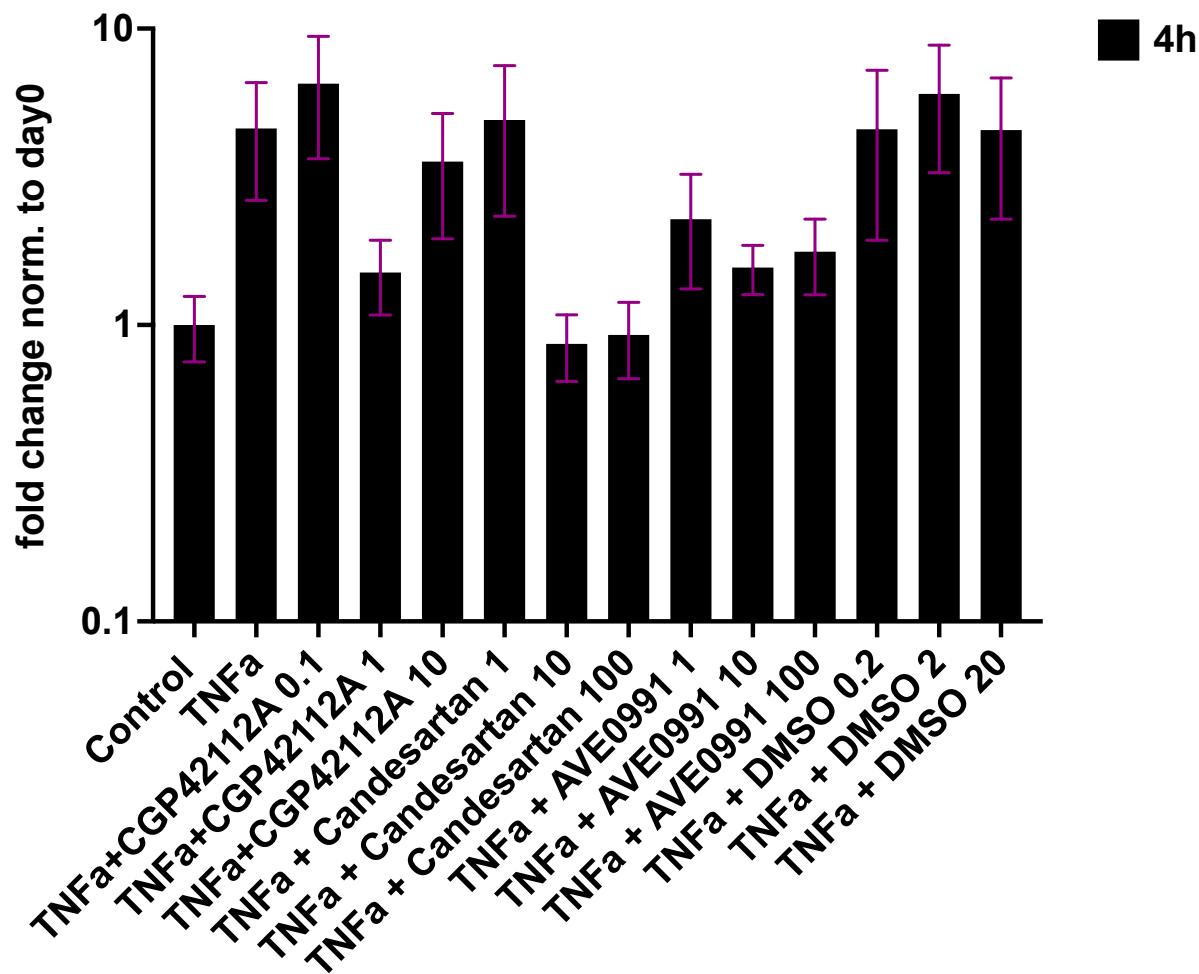

# IL-1b

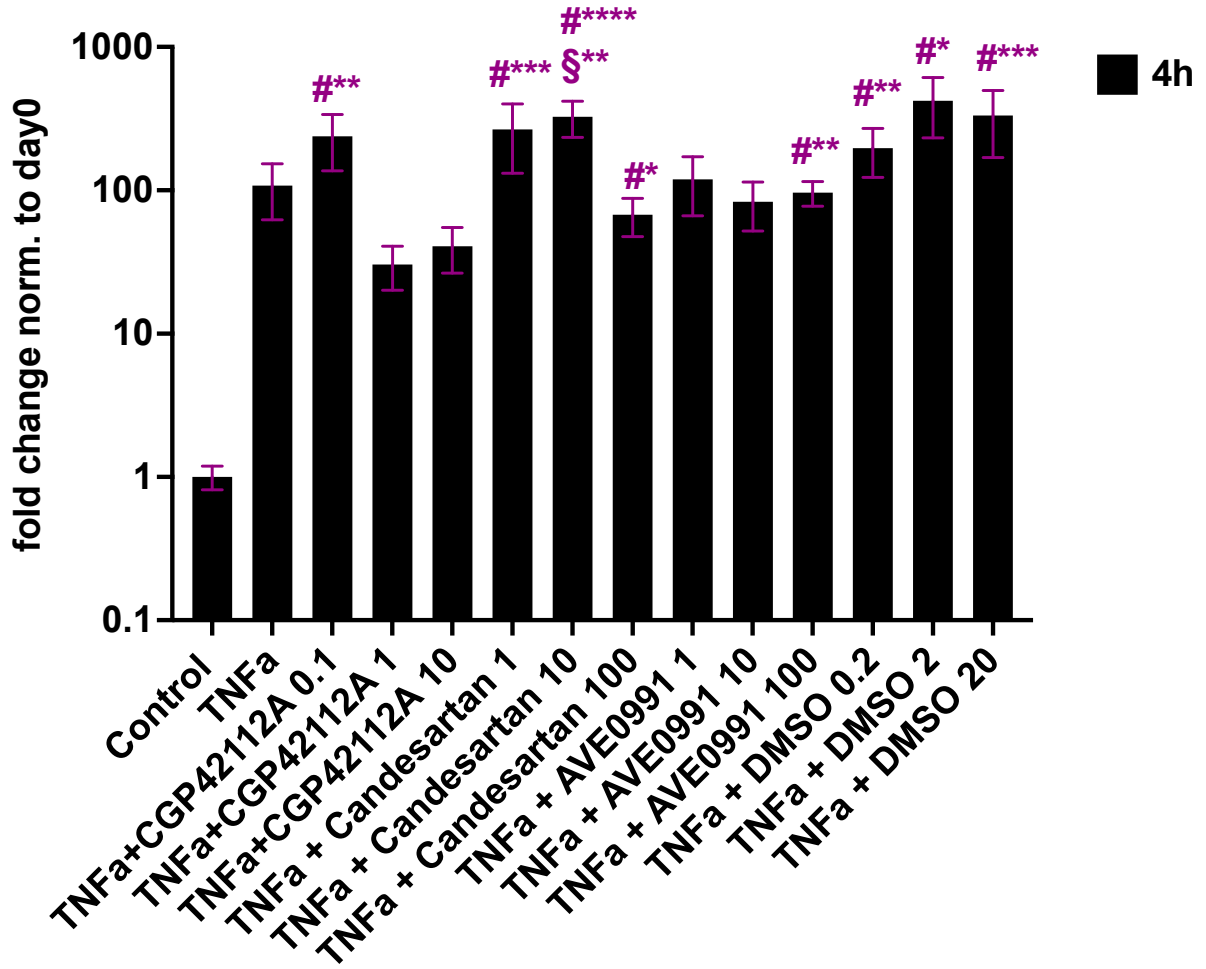

# IL6

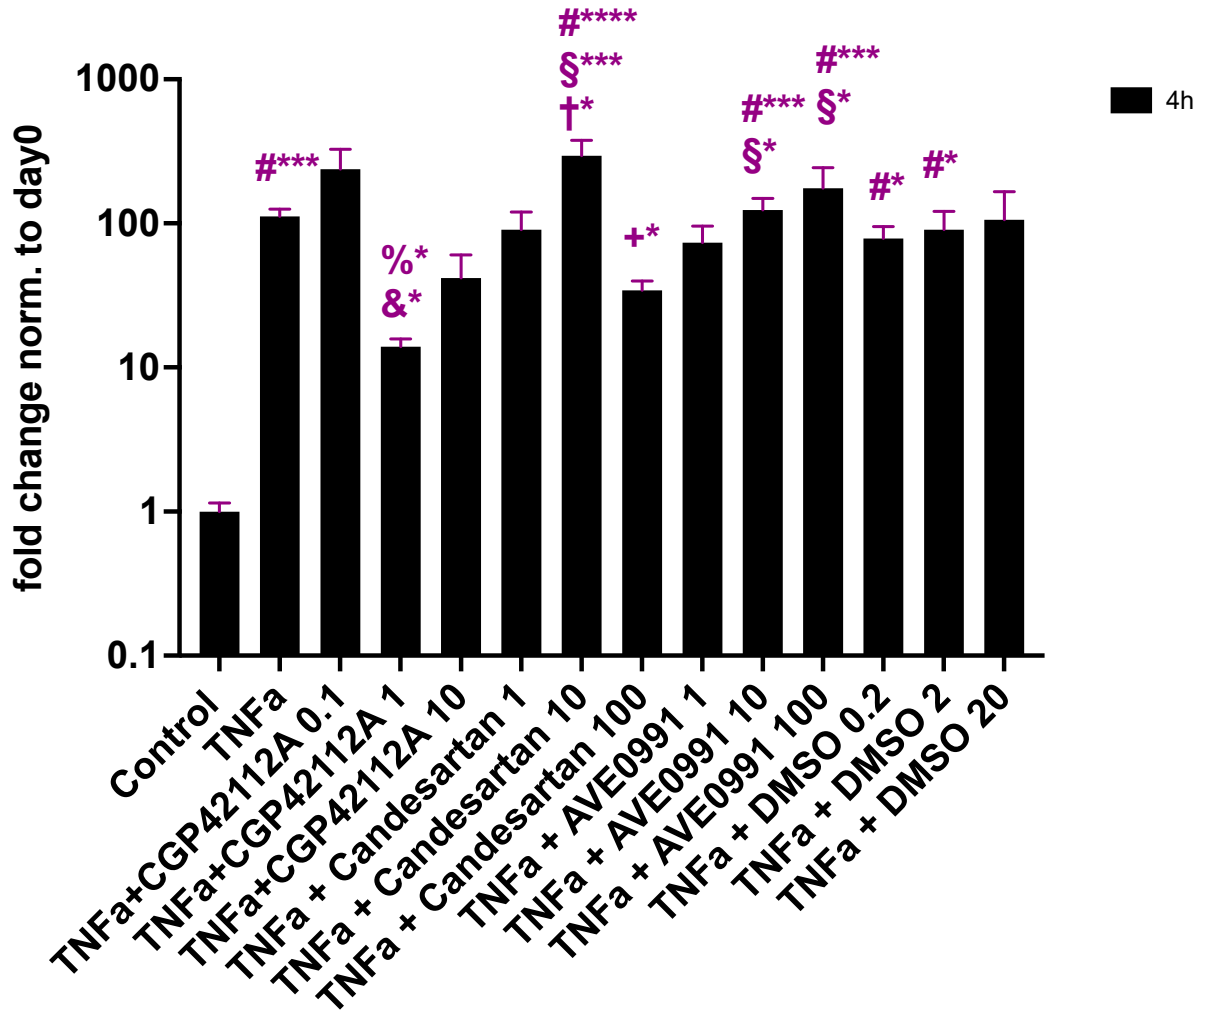

## IL6/IL10 ratio

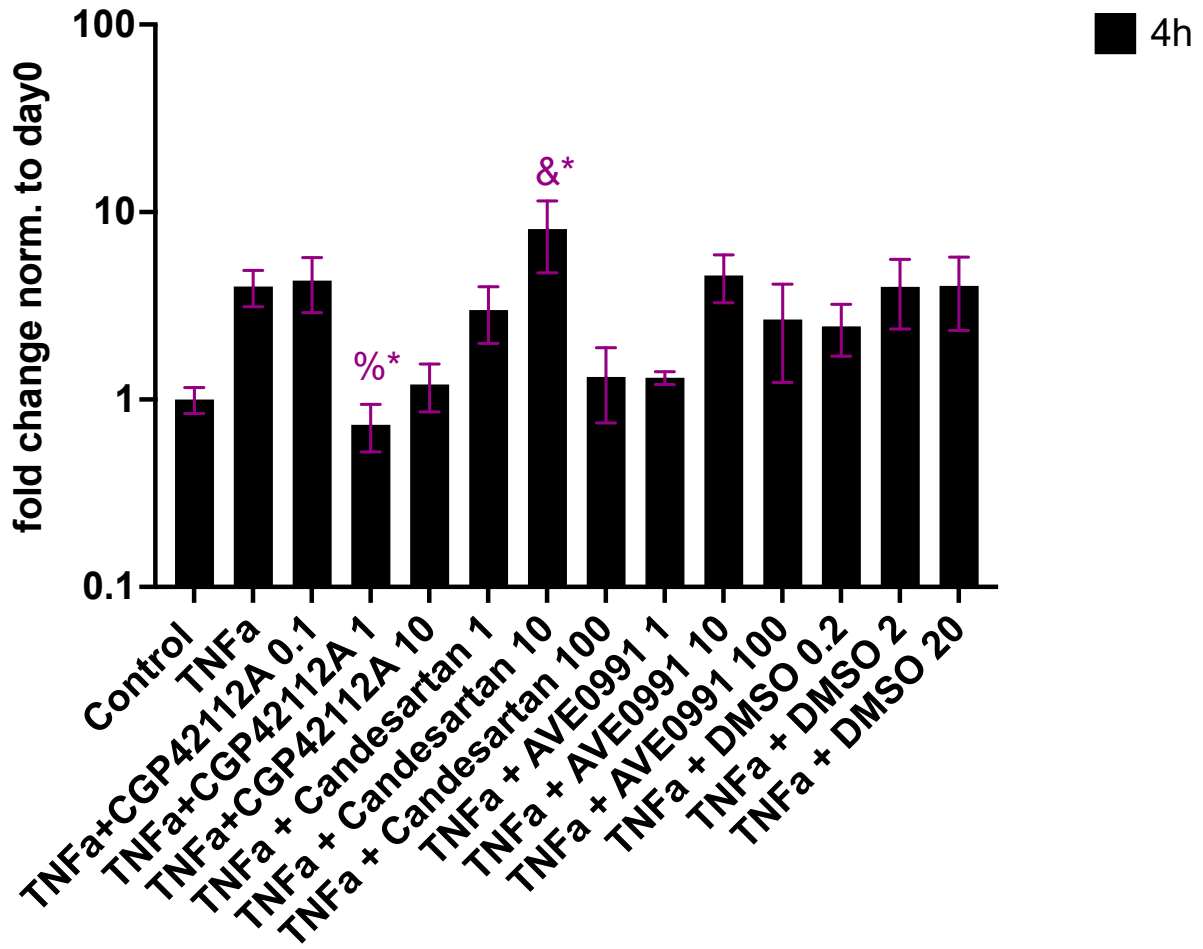

# IL8

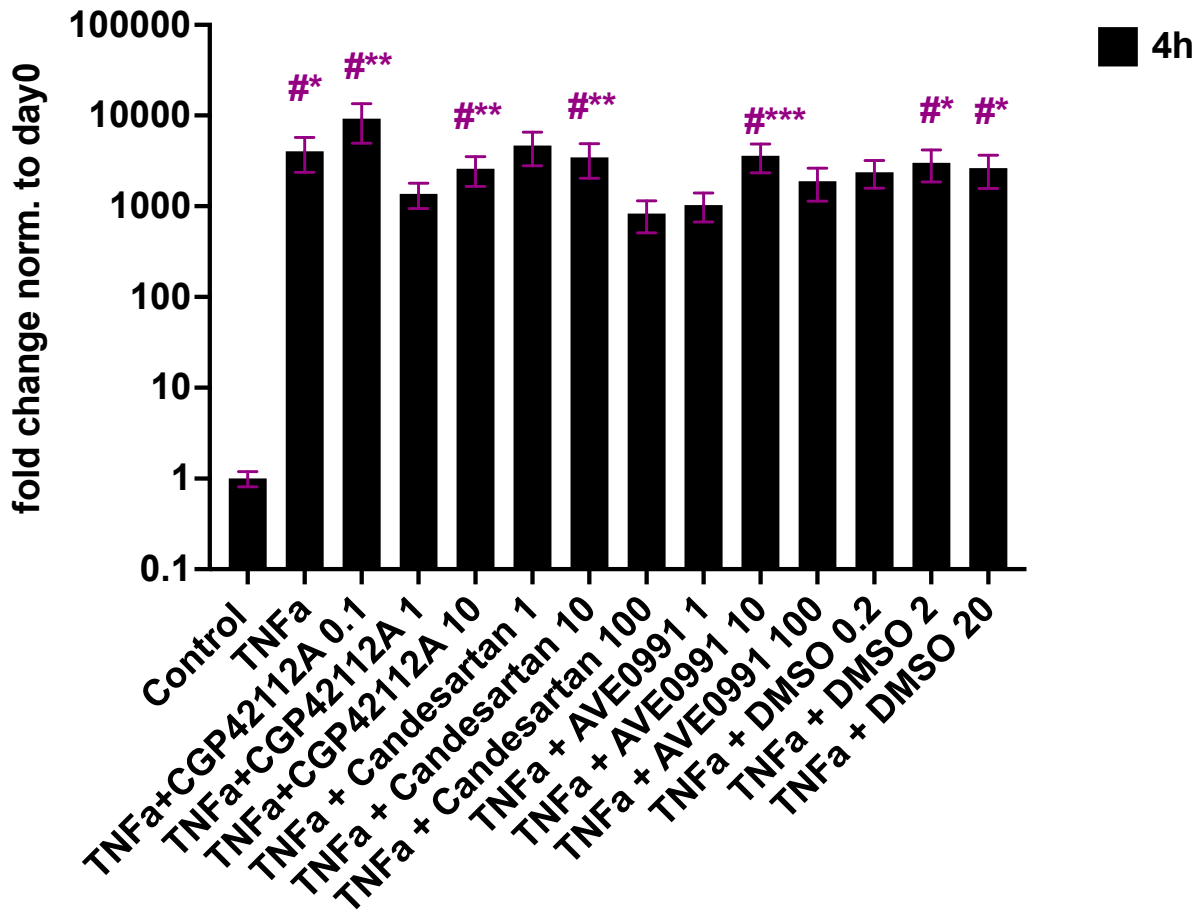

# IL8/IL10 ratio

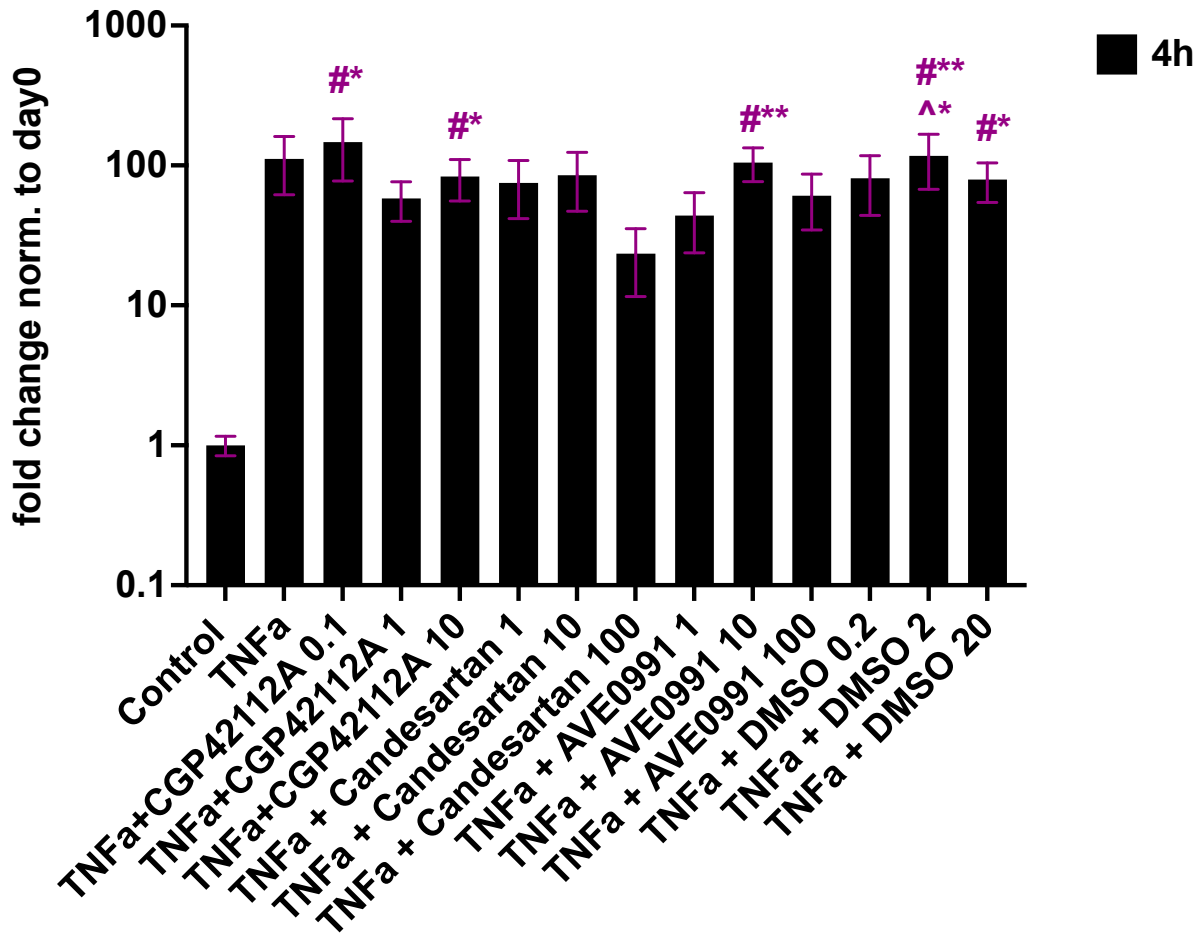

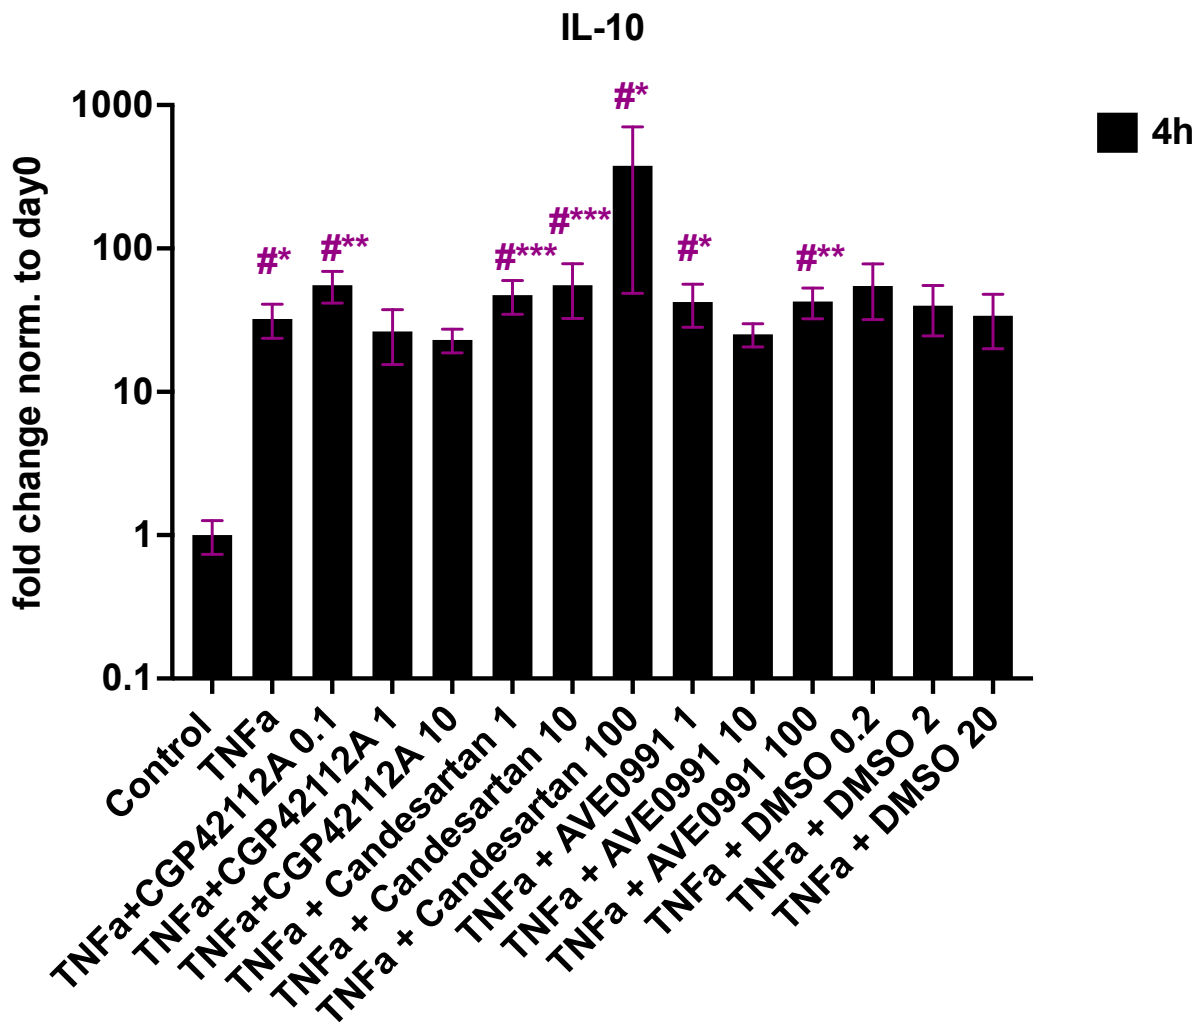

# MAS1

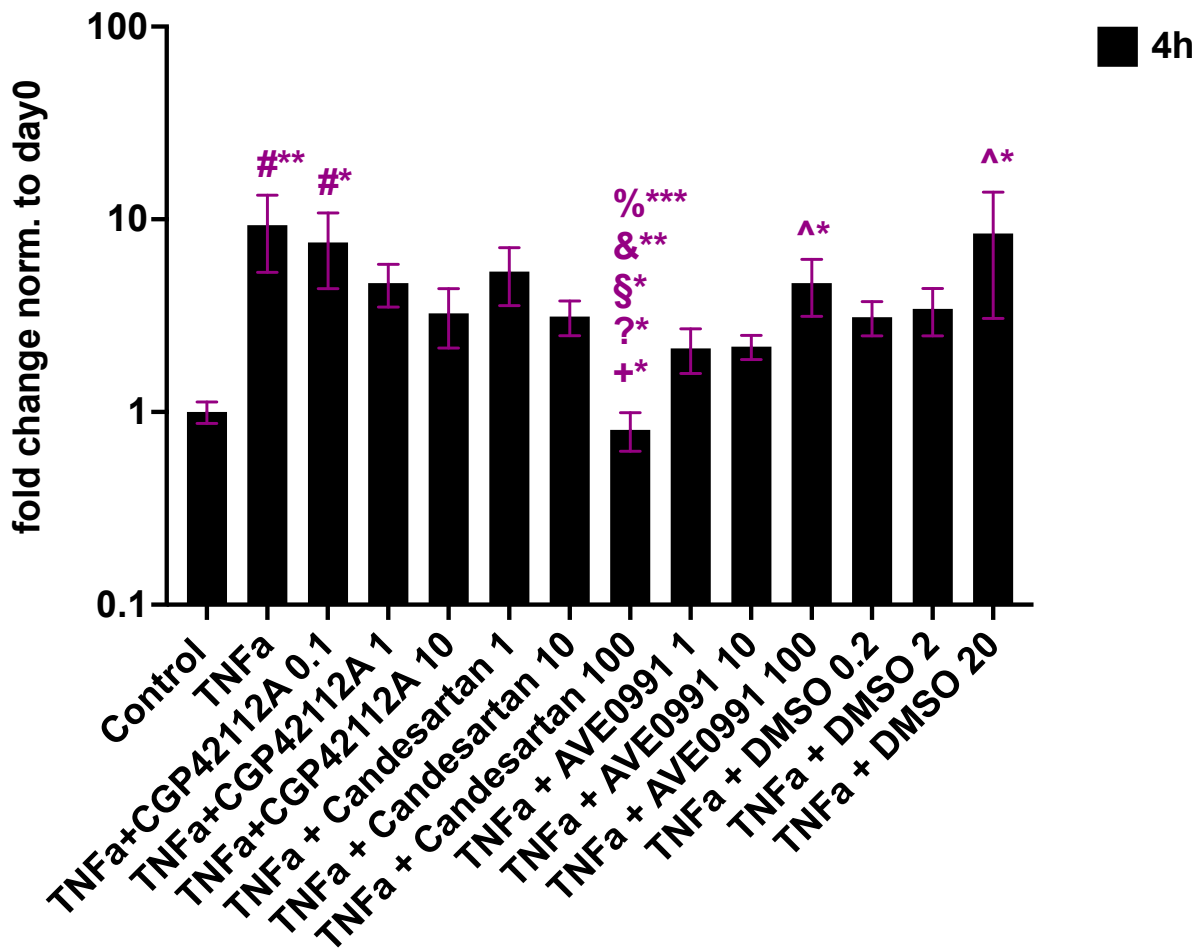



MMP1

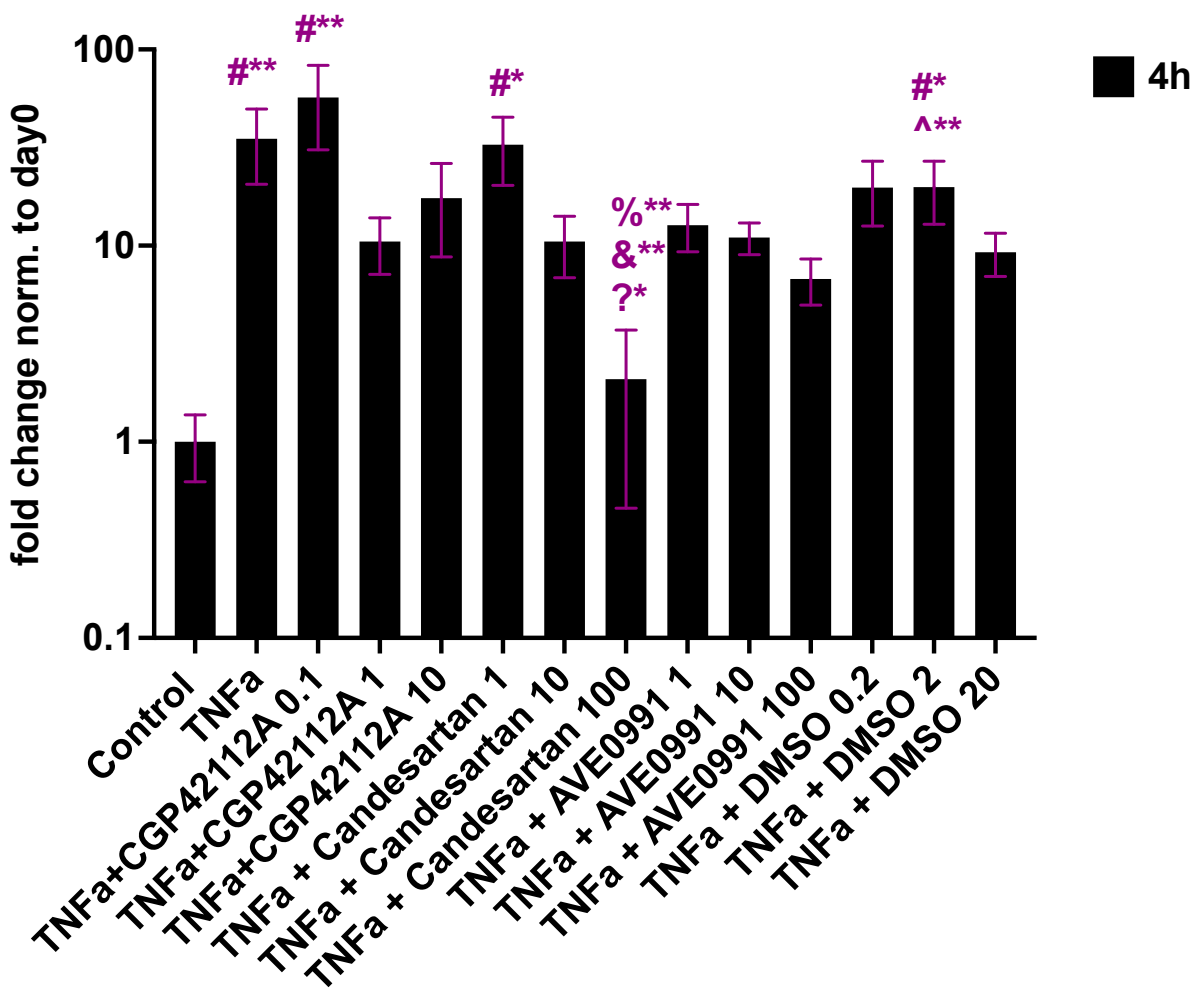

## MMP3

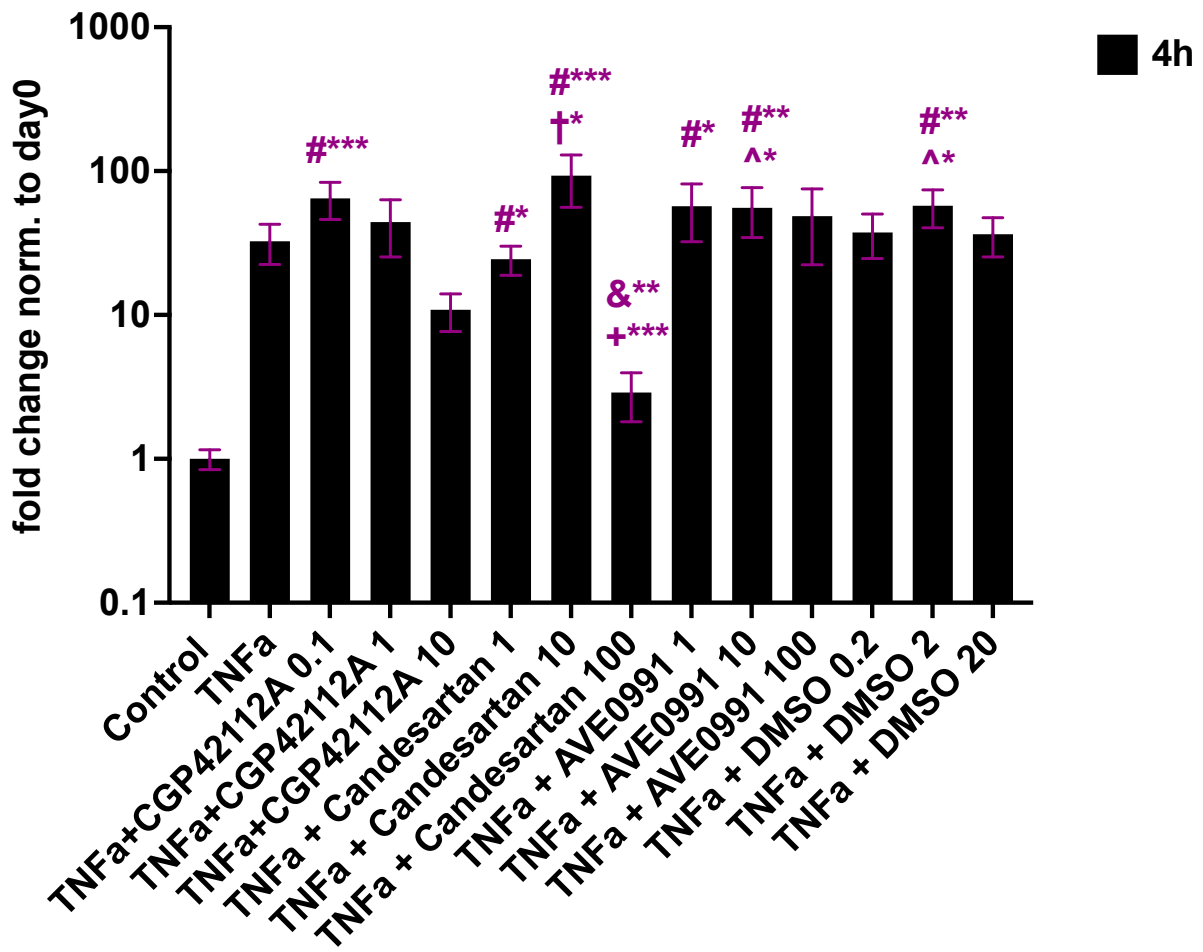

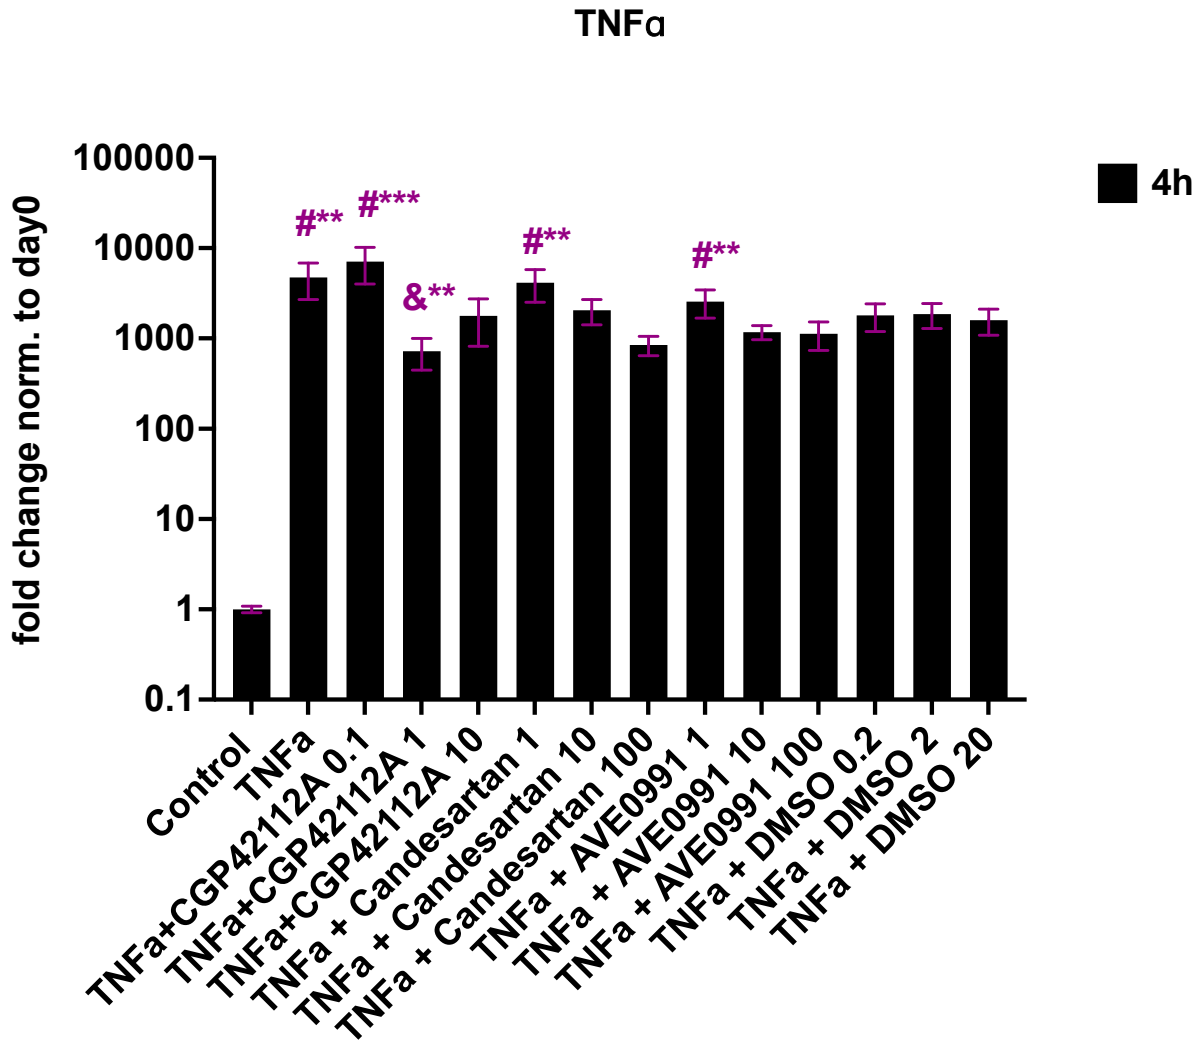

**Supplementary Figure S3.** Gene expression analysis in human NP cells for Candesartan (1 $\mu$ M, 10 $\mu$ M, 100 $\mu$ M), the MAS-receptor agonist AVE 0991 (1 $\mu$ M, 10 $\mu$ M, 100 $\mu$ M), and the AGTR2-receptor agonist CGP-42112A (0.1 $\mu$ M, 1 $\mu$ M, 10 $\mu$ M) with 4 h of exposure in in-inflammatory settings (TNF- $\alpha$  addition). DMSO (0.1 $\mu$ L/ml, 1 $\mu$ L/ml, 10 $\mu$ L/ml; shown in  $\mu$ L volume on the x-axis) was used as the solvent control. Fold change values normalized to the baseline (day 0) are shown. n=4 biological replicates and n=3 technical replicates per donor were assessed. Mean and standard error of the mean (SEM) are shown. #: compared to Control; %: compared to TNF- $\alpha$ ; &: compared to TNF- $\alpha$ +CGP42122A 0.1  $\mu$ M; §: compared to TNF- $\alpha$ +CGP42122A 1  $\mu$ M; †: compared to TNF- $\alpha$ +CGP42122A 10  $\mu$ M; ?: compared to TNF- $\alpha$ +Candesartan 1  $\mu$ M; +: com-pared to TNF-alpha+Candesartan 10  $\mu$ M; ^: compared to TNF- $\alpha$ +Candesartan 100  $\mu$ M; \$: com-pared to TNF-alpha+AVE0991 10  $\mu$ M; !: compared to TNF-alpha+AVE0991 100  $\mu$ M. \* p < 0.05; \*\* p < 0.01; \*\*\* p < 0.001; \*\*\*\* p < 0.0001.
