# Supplementary material for: In Vitro Characterization of a Tissue Renin-Angiotensin System in Human Nucleus Pulposus Cells
Source: MDPI journal article supplement (doi:10.3390/cells11213418), 2022-10-28
Supplement: s1 [file s1]

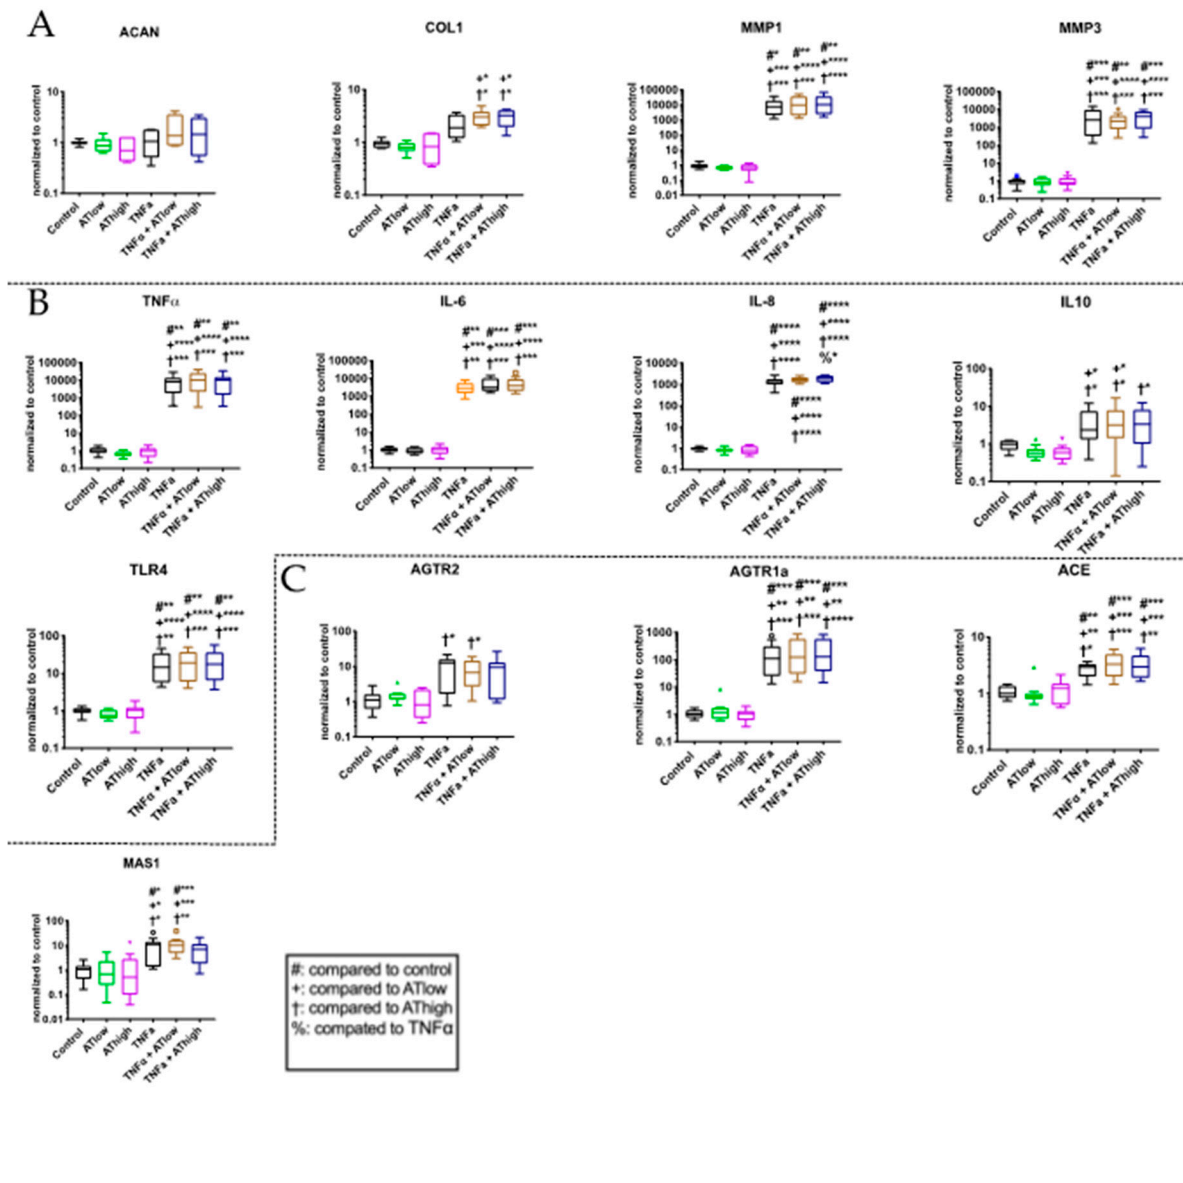

**Supplementary Figure S1.** Gene expression analysis in human NP cells for angiotensin II (0.1 $\mu$ M (“ATlow”) and 10 $\mu$ M (“AThigh”) with 24 h of exposure. Fold change values obtained from the  $2^{-(\Delta\Delta Ct)}$  method and normalized to the baseline (day 0) are shown. n=4 biological replicates and n=3 technical replicates per donor were assessed. Box plots are shown (median and interquartile range). Outliers are represented as symbols. #: compared to control; +: compared to ATlow (0.1 $\mu$ M); †: compared to AThigh (10 $\mu$ M); %: compared to TNF- $\alpha$ . \* p < 0.05; \*\* p < 0.01; \*\*\* p < 0.001; \*\*\*\* p < 0.0001.
